# Supplementary material
Source: PubMed Central journal article supplement (PMC8161492)
Supplement: oc0c01186_si_001.pdf [file oc0c01186_si_001.pdf]

## Supporting Information

### Figures

1. Dose-Response Curve of Simeprevir and Remdesivir in A549-ACE2 Cells
2. SDS-PAGE analysis of recombinant SARS-CoV-2 M<sup>pro</sup>
3. Supplementary Data of M<sup>pro</sup> FRET Assay
4. Docking of Simeprevir on M<sup>pro</sup>
5. Supplementary Data of PL<sup>pro</sup> Fluorescence Assay with Ubiquitin Substrate
6. Supplementary Data of PL<sup>pro</sup> Gel-Based Assay
7. Docking of Simeprevir and Other Inhibitors against SARS-CoV-2 nsp12
8. Supplementary Data of RdRp Gel-Based Assay
9. Gene Set Enrichment Analysis (GSEA) of SARS-CoV-2 infection
10. Focused Analyses of Interferon-Related Genes in RNA-seq Data
11. Viral Titration Assay and qPCR of A549-ACE2 cells under Simeprevir treatment
12. qPCR of A549-ACE2 cells under JAK inhibitor and Simeprevir treatment

### Tables

1. A List of FDA-approved repurposable drug candidates
2. Gene Set Enrichment Analysis (GSEA) of Simeprevir in infected samples

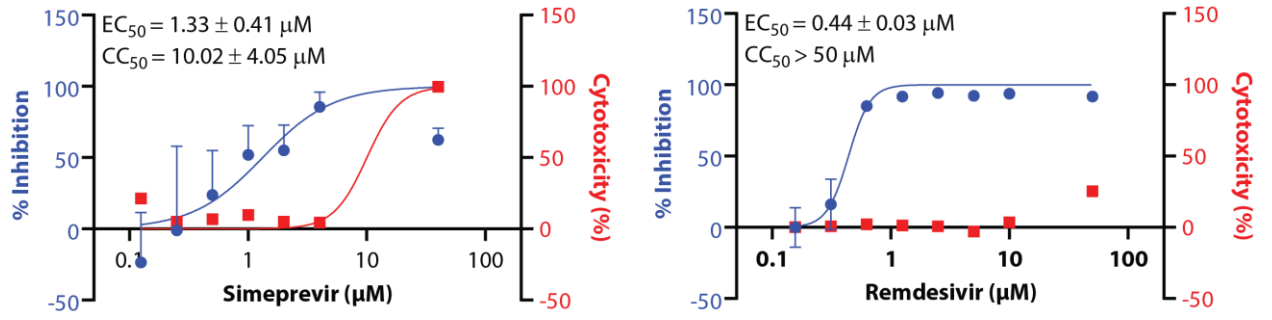

**Supplementary Fig. 1** Dose-response curves in the suppression of SARS-CoV-2 replication in A549-ACE2 cells and cytotoxicity for simeprevir (**Left**) and remdesivir (**Right**) are shown. Data points in all plots represent mean  $\pm$  S.E.M.. For all data points,  $n = 3$  replicates.

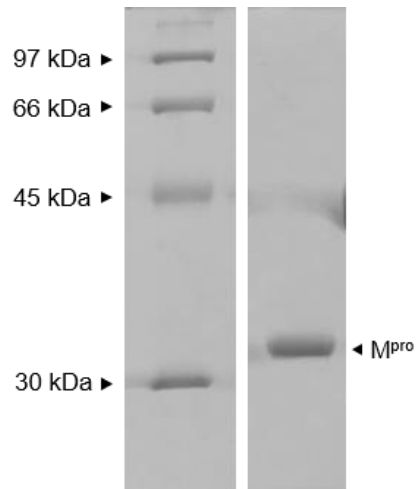

**Supplementary Fig. 2** SDS-PAGE analysis of recombinant SARS-CoV-2 M<sup>pro</sup>.

A

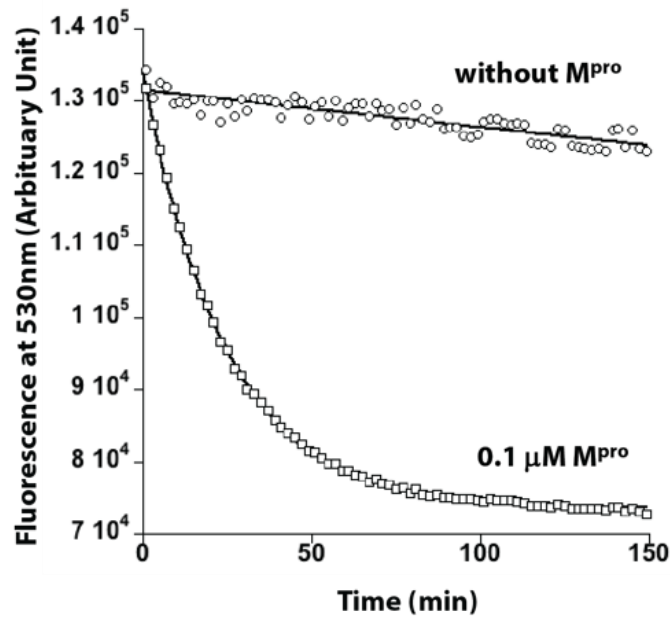

B

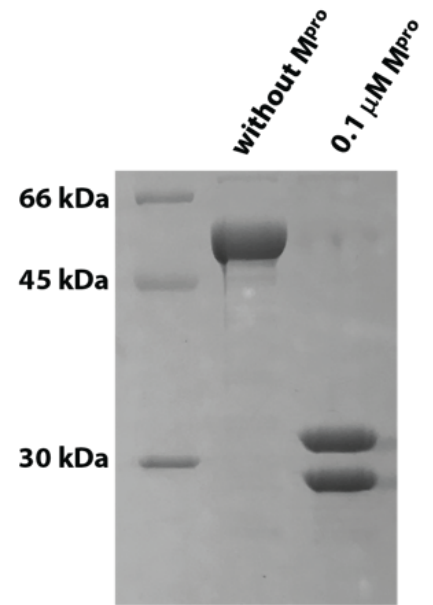

C

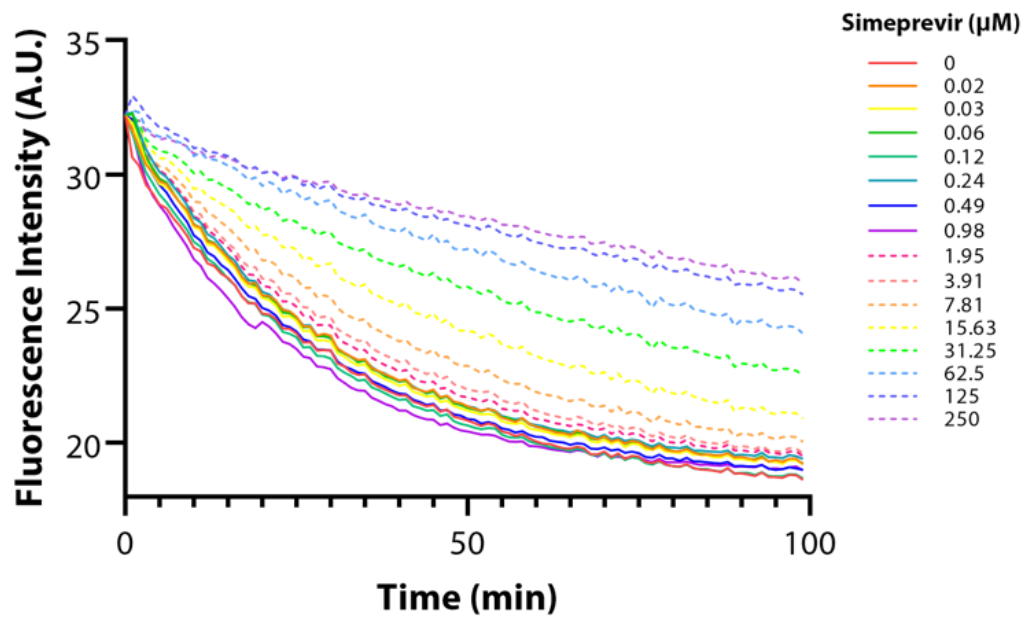

**Supplementary Fig. 3 (A)** The addition of SARS-CoV-2 M<sup>pro</sup> led to the cleavage of the substrate, causing detectable decline in FRET signal with 430-nm excitation and 530-nm emission. **(B)** Confirmation of substrate cleavage by M<sup>pro</sup> using SDS-PAGE. **(C)** The addition of simeprevir at varying concentrations attenuated the rate of FRET substrate cleavage by M<sup>pro</sup>.

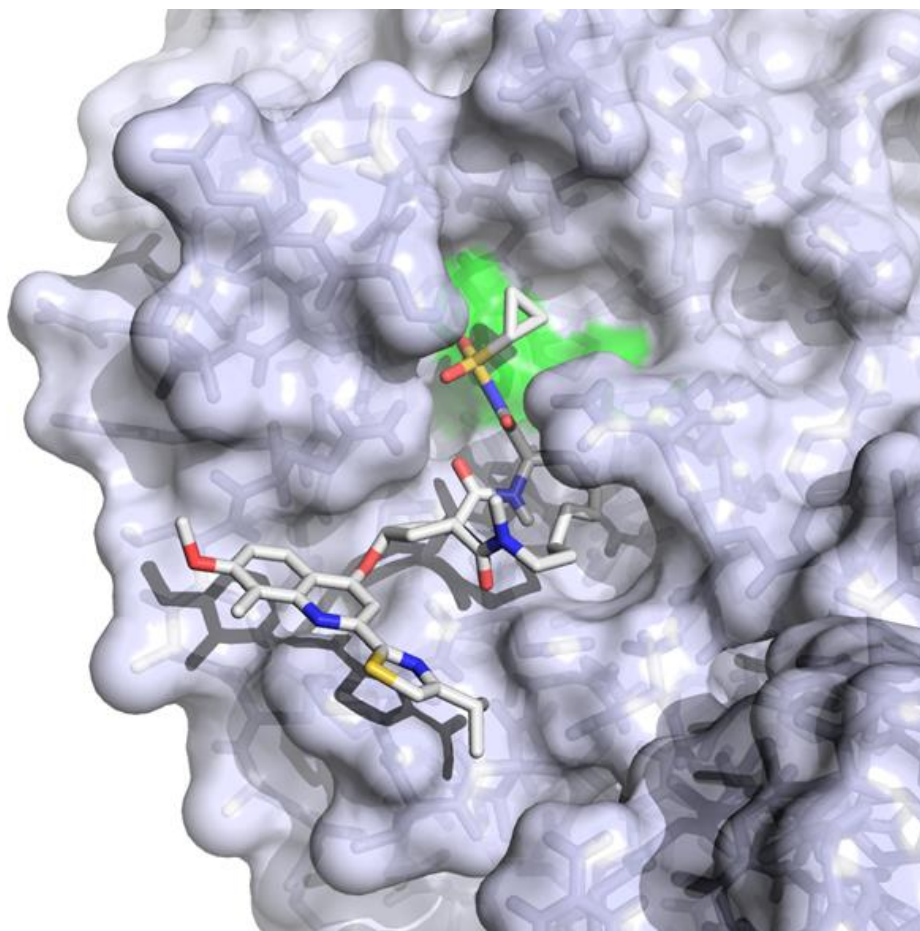

**Supplementary Fig. 4** Docking of simeprevir on SARS-CoV-2 M<sup>pro</sup> (performed with AutoDock Vina version 1.1.2). The M<sup>pro</sup> structure was based on an apo protein crystal structure (PDB ID: 6YB7); the A:B dimer was generated by crystallographic symmetry. Docking was run with the substrate-binding residues set to be flexible; and a 30 x 30 x 30 Å<sup>3</sup> search box centered near the side-chain Nε2 atom of His163. The top docking mode shown here scored -9.9 kcal mol<sup>-1</sup>. The protein is shown as a semi-transparent molecular surface encasing its stick model with the catalytic residues His41 and Cys145 in green. The ligand is shown as a stick model with oxygen atoms in red; nitrogen atoms in blue, sulfur atoms in yellow and carbon atoms in white.

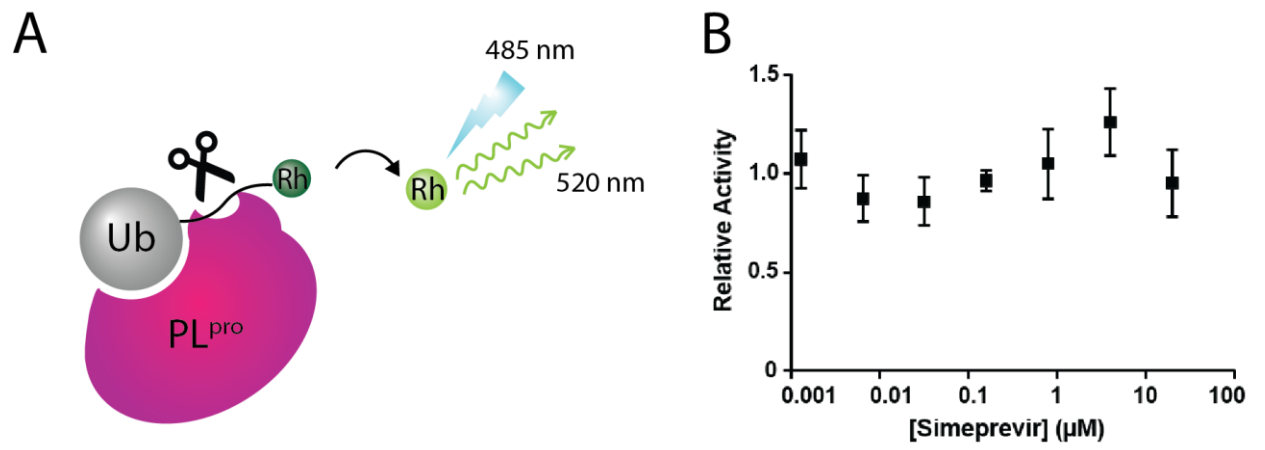

**Supplementary Fig. 5** Simeprevir did not inhibit PL<sup>pro</sup> activity in a repeated PL<sup>pro</sup> cleavage assay using a different substrate ubiquitin-rhodamine.

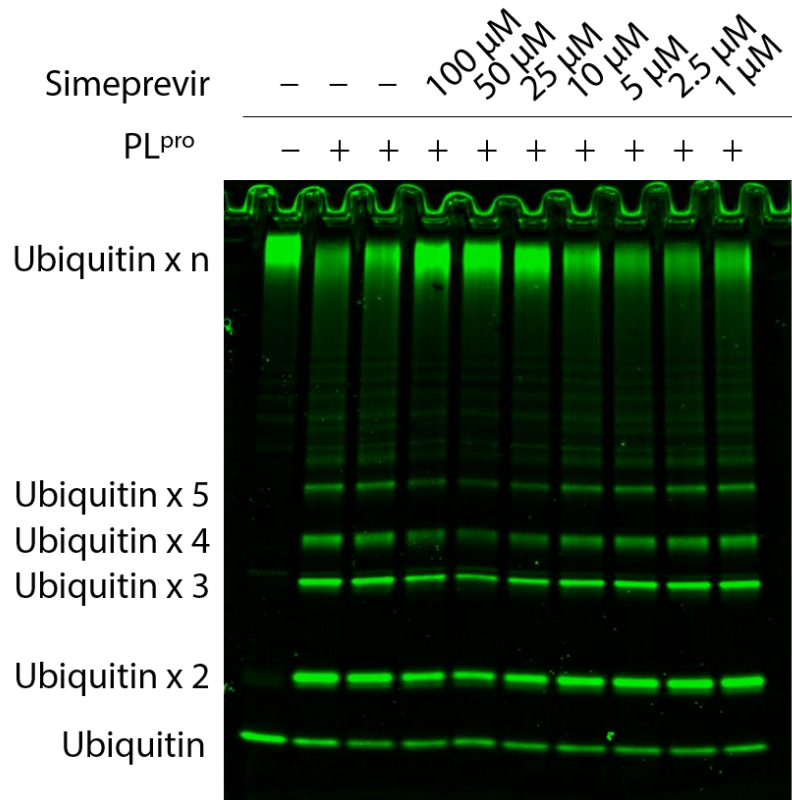

**Supplementary Fig. 6** Inhibitor deubiquitination assay of PL<sup>pro</sup> shows PL<sup>pro</sup> (SARS-CoV-2) actively cleaves poly-ubiquitinated substrate into di-ubiquitin or longer ubiquitin chain. While simeprevir was added in reaction solution, the activity of PL<sup>pro</sup> was not profoundly inhibited compared to control experiments (no inhibitor and no inhibitor with 2% DMSO).

**A**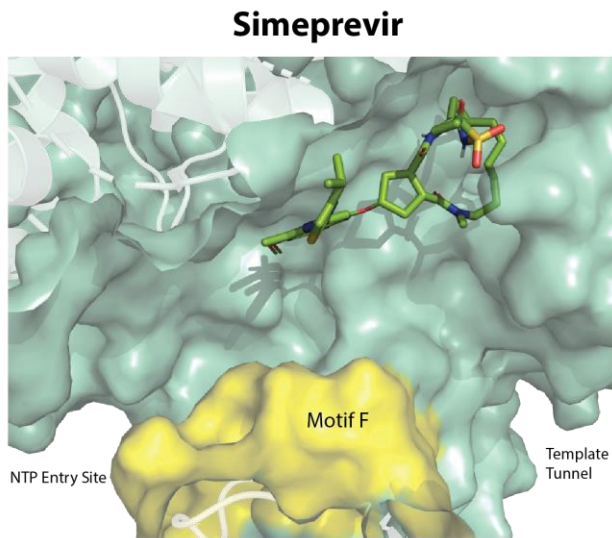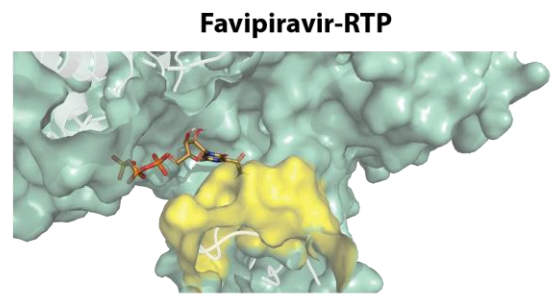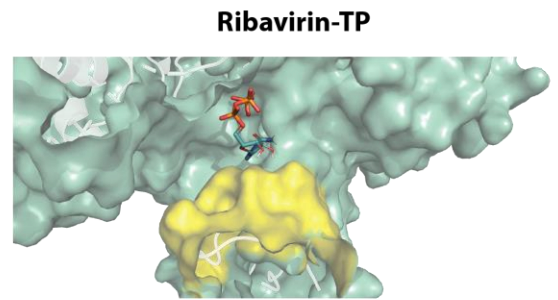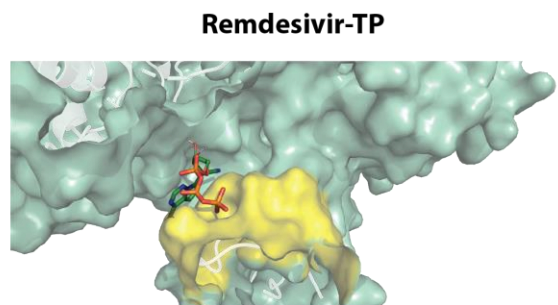**B**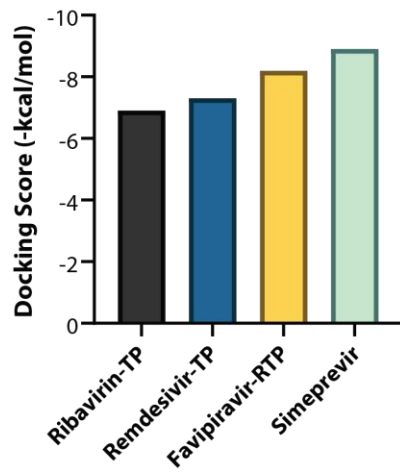

**Supplementary Fig. 7 (A)** Binding mode of simeprevir and other inhibitors against SARS-CoV-2 nsp12 (PDB ID: 6M71). Motif F is highlighted in yellow. **(B)** Docking scores of drug candidates against nsp12.



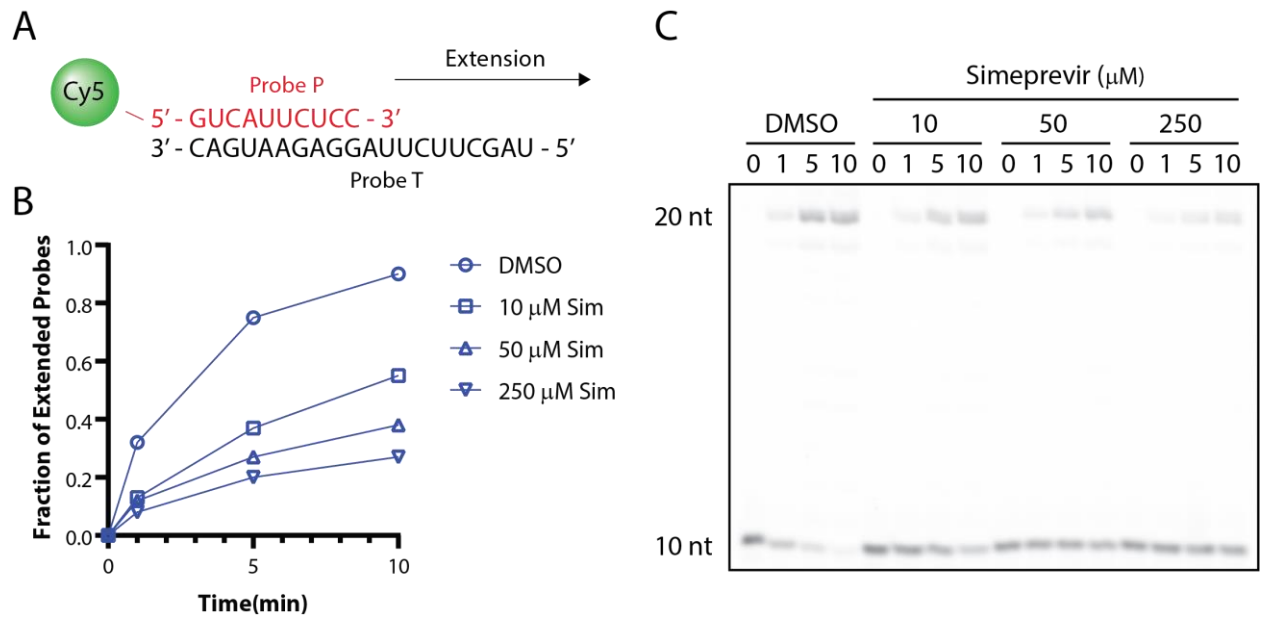

**Supplementary Fig. 8 (A)** Gel-based assay scheme for SARS-CoV-RdRp. Two partially complementary RNA probes are extended by the enzyme, and the extent of extension is visualized by detecting the Cy5 labeling of the shorter probe P. **(B)** Time-dependent elongation of probe P. Fraction of extension is determined by densitometry of extended product versus total RNA. **(C)** RNA-PAGE imaged with Cy5 mode.

## DMSO infected vs. DMSO uninfected

| Gene Set                      | NES  | FDR q-val |
|-------------------------------|------|-----------|
| RESPONSE_TO_TYPE_I_INTERFERON | 1.88 | 0.101     |
| DEFENSE_RESPONSE_TO_VIRUS     | 1.51 | 0.101     |
| RESPONSE_TO_CHEMOKINE         | 1.36 | 0.133     |

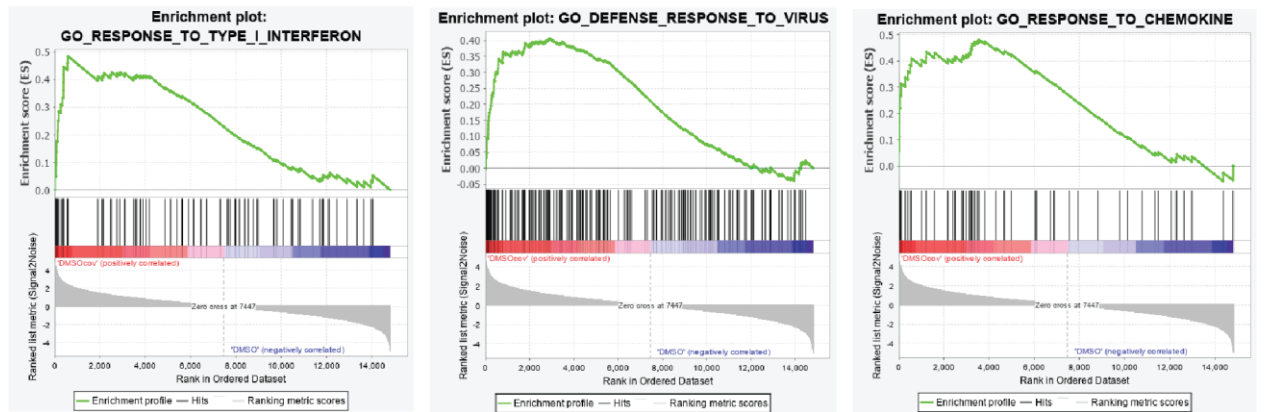

**Supplementary Fig. 9** Gene set enrichment analysis of SARS-CoV-2 infection. Relevant statistics and enrichment plots for three gene sets in response to virus infection are shown.

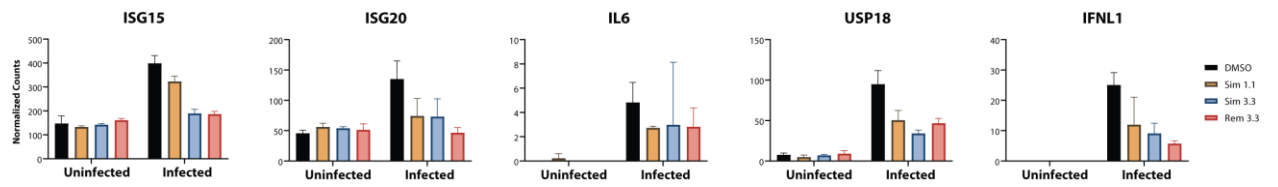

**Supplementary Fig. 10** Bar charts showing normalized counts from RNA-seq data of five genes involved in antiviral response in Vero E6 cells. Data points in this plot represent mean  $\pm$  S.E.M. For all data points,  $n = 3$  replicates.

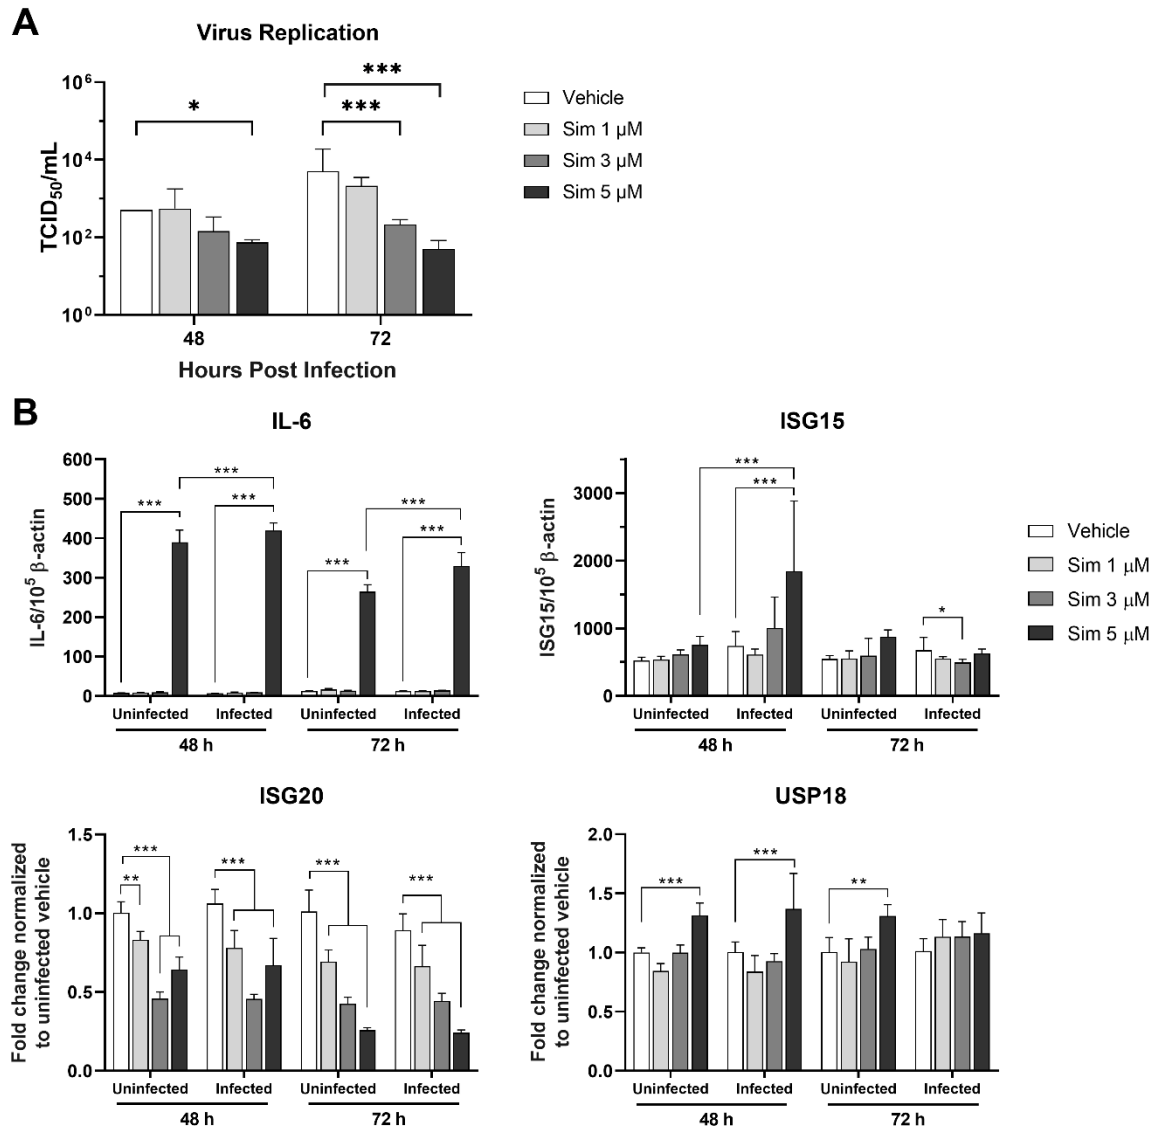

**Supplementary Fig. 11 (A)** Viral titration assay using A549-ACE2 cells treated with various concentrations of simeprevir. **(B)** Relative RNA level of various genes in uninfected or infected A549-ACE2 cells, treated with various concentrations of simeprevir. Data points in all plots represent mean  $\pm$  S.E.M.. For all data points,  $n = 3$  replicates. \*: p-value < 0.05, \*\*\*: p-value < 0.005.

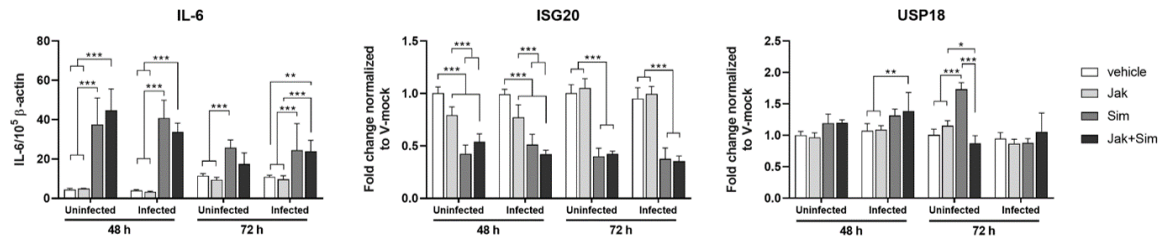

**Supplementary Fig. 12** Relative RNA level of various genes in uninfected or infected A549-ACE2 cells, treated with 4  $\mu$ M Simeprevir and/or 1  $\mu$ M JAK inhibitor I. Data points in all plots represent mean  $\pm$  S.E.M.. For all data points,  $n = 3$  replicates. \*: p-value < 0.05, \*\*: p-value < 0.01; \*\*\*: p-value < 0.005.

| <b>Drug candidate</b> | <b>Approved indication(s)</b>                                                    | <b>Common/notable adverse effects</b>                                                        | <b>Drug formulation(s) available</b> | <b>Contraindications (except known hypersensitivity to the drug)</b> |
|-----------------------|----------------------------------------------------------------------------------|----------------------------------------------------------------------------------------------|--------------------------------------|----------------------------------------------------------------------|
| Simeprevir            | Chronic HCV infection                                                            | Photosensitivity, rash, fatigue, myalgia, dyspnea                                            | Oral                                 | None                                                                 |
| Daclatasvir           | Chronic HCV infection                                                            | Fatigue, nausea, anemia, diarrhea                                                            | Oral                                 | None                                                                 |
| Saquinavir            | HIV infection                                                                    | Nausea, diarrhea, QT prolongation                                                            | Oral                                 | Prolonged QT interval, Patients at risk/having complete AV block     |
| Bromocriptine         | Hyperprolactinemia, pituitary prolactinoma                                       | Constipation, dizziness, nausea, fatigue, orthostatic hypotension, vasospasm, abdominal pain | Oral                                 | Uncontrolled hypertension, psychosis, syncopal migraine              |
| Asunaprevir           | HIV infection                                                                    | Fatigue, rash, nausea, neutropenia, anemia, deranged liver function tests                    | Oral                                 | Moderate/severe hepatic impairment (Child B or C)                    |
| Bictegravir           | HIV infection                                                                    | Increased serum creatine kinase, deranged liver function tests, neutropenia                  | Oral                                 | None                                                                 |
| Entecavir             | HBV infection                                                                    | Deranged liver function tests                                                                | Oral                                 | Moderate/severe hepatic impairment (Child B or C)                    |
| Zidovudine            | HIV infection                                                                    | Headache, malaise, rash, nausea, neutropenia, anemia                                         | Oral                                 | None                                                                 |
| Sofosbuvir            | Chronic HCV infection                                                            | Fatigue, headache, insomnia, nausea, diarrhea, anemia, myalgia, rash                         | Oral                                 | None                                                                 |
| Atovaquone            | Protozoal infection or prophylaxis (Pneumocystis jirovecii, Plasmodium spp. etc) | Headache, insomnia, rash, diarrhea, myalgia, drug fever, hyponatremia, neutropenia           | Oral                                 | None                                                                 |
| Remdesivir            | COVID-19                                                                         | Deranged liver function tests                                                                | Intravenous                          | Serum alanine transaminase $\geq 5$ x the upper-limit of normal      |

**Supplementary Table 1** FDA-approved repurposable drug candidates tested in this study.

| NAME                                                                                                              | SIZE | NES      | FDR q-val |
|-------------------------------------------------------------------------------------------------------------------|------|----------|-----------|
| REACTOME_PKMTS_METHYLATE_HISTONE_LYSINES                                                                          | 46   | 2.035874 | 0.044     |
| REACTOME_MITOTIC_PROPHASE                                                                                         | 109  | 1.795425 | 0.213909  |
| REACTOME_RMTS_METHYLATE_HISTONE_ARGININES                                                                         | 49   | 1.748761 | 0.228738  |
| REACTOME_NRIF_SIGNALS_CELL_DEATH_FROM_THE_NUCLEUS                                                                 | 15   | 1.739992 | 0.193812  |
| REACTOME_SCF_SKP2_MEDIATED_DEGRADATION_OF_P27_P21                                                                 | 56   | 1.705256 | 0.24902   |
| REACTOME_RHO_GTPASES_ACTIVATE_PKNS                                                                                | 58   | 1.70523  | 0.21485   |
| REACTOME_CELLULAR_SENESCENCE                                                                                      | 154  | 1.700467 | 0.203287  |
| REACTOME_MEIOTIC_RECOMBINATION                                                                                    | 51   | 1.70042  | 0.183376  |
| REACTOME_MEIOSIS                                                                                                  | 77   | 1.698298 | 0.17955   |
| REACTOME_AUF1_HNRNP_D0_BINDS_AND_DESTABILIZES_MRNA                                                                | 51   | 1.689022 | 0.170498  |
| REACTOME_GENE_SILENCING_BY_RNA                                                                                    | 98   | 1.680767 | 0.185941  |
| REACTOME_ASYMMETRIC_LOCALIZATION_OF_PCP_PROTEINS                                                                  | 58   | 1.662479 | 0.215862  |
| REACTOME_CONDENSATION_OF_PROPHASE_CHROMOSOMES                                                                     | 43   | 1.661445 | 0.209014  |
| REACTOME_MICRORNA_MIRNA_BIOGENESIS                                                                                | 24   | 1.645813 | 0.21082   |
| REACTOME_INTERLEUKIN_7_SIGNALING                                                                                  | 24   | 1.643195 | 0.199699  |
| REACTOME_TRANSCRIPTIONAL_REGULATION_BY_SMALL_RNAS                                                                 | 75   | 1.642892 | 0.189968  |
| REACTOME_RUNX1_REGULATES_TRANSCRIPTION_OF_GENES_INVOLVED_IN_DIFFERENTIATION_OF_HSCS                               | 93   | 1.639989 | 0.183625  |
| REACTOME_HDMS_DEMETHYLATE_HISTONES                                                                                | 30   | 1.624097 | 0.189556  |
| REACTOME_ESTROGEN_DEPENDENT_GENE_EXPRESSION                                                                       | 114  | 1.623586 | 0.181895  |
| REACTOME_G1_S_DNA_DAMAGE_CHECKPOINTS                                                                              | 63   | 1.622633 | 0.177329  |
| REACTOME_REGULATION_OF_MRNA_STABILITY_BY_PROTEINS_THAT_BIND_AU_RICH_ELEMENTS                                      | 81   | 1.619633 | 0.179618  |
| REACTOME_DEFECTIVE_CFTR_CAUSES_CYSTIC_FIBROSIS                                                                    | 56   | 1.616455 | 0.179718  |
| REACTOME_APC_C_CDH1_MEDIATED_DEGRADATION_OF_CDC20_AND_OTHER_APC_C_CDH1_TARGETED_PROTEINS_IN_LATE_MITOSIS_EARLY_G1 | 67   | 1.613433 | 0.177683  |

|                                                                                                                |     |          |          |
|----------------------------------------------------------------------------------------------------------------|-----|----------|----------|
| REACTOME_PRC2_METHYLATES_HISTONES_AND_DNA                                                                      | 41  | 1.606214 | 0.17865  |
| REACTOME_EUKARYOTIC_TRANSLATION_INITIATION                                                                     | 81  | 1.603774 | 0.174798 |
| REACTOME_HDACS_DEACETYLATE_HISTONES                                                                            | 55  | 1.59932  | 0.175764 |
| REACTOME_CELLULAR_RESPONSE_TO_HYPOXIA                                                                          | 67  | 1.596512 | 0.170884 |
| REACTOME_RNA_POLYMERASE_I_TRANSCRIPTION                                                                        | 78  | 1.595998 | 0.166353 |
| REACTOME_HATS_ACETYLATE_HISTONES                                                                               | 103 | 1.594675 | 0.169724 |
| REACTOME_RNA_POLYMERASE_I_PROMOTER_ESCAPE                                                                      | 59  | 1.593383 | 0.167005 |
| REACTOME_FORMATION_OF_THE_EARLY_ELONGATION_COMPLEX                                                             | 32  | 1.593123 | 0.163037 |
| REACTOME_SWITCHING_OF_ORIGINS_TO_A_POST_REPLICATIVE_STATE                                                      | 84  | 1.590331 | 0.165325 |
| REACTOME_FANCONI_ANEMIA_PATHWAY                                                                                | 35  | 1.587149 | 0.16675  |
| REACTOME_APOPTOTIC_FACTOR_MEDIATED_RESPONSE                                                                    | 16  | 1.585396 | 0.16314  |
| REACTOME_ACTIVATION_OF_THE_MRNA_UPON_BINDING_OF_THE_CAP_BINDING_COMPLEX_AND_EIF5_AND_SUBSEQUENT_BINDING_TO_43S | 42  | 1.585282 | 0.159736 |
| REACTOME_ERCC6_CSB_AND_EHMT2_G9A_POSITIVELY_REGULATE_RRNA_EXPRESSION                                           | 44  | 1.577036 | 0.163907 |
| REACTOME_ACTIVATION_OF_ANTERIOR_HOX_GENES_IN_HINDBRAIN_DEVELOPMENT_DURING_EARLY_EMBRYOGENESIS                  | 87  | 1.5695   | 0.168932 |
| REACTOME_HCMV_LATE_EVENTS                                                                                      | 77  | 1.569343 | 0.165644 |
| REACTOME_STABILIZATION_OF_P53                                                                                  | 52  | 1.5621   | 0.176659 |
| REACTOME_HIV_TRANSCRIPTION_ELONGATION                                                                          | 40  | 1.56044  | 0.175868 |
| REACTOME_NEGATIVE_EPIGENETIC_REGULATION_OF_RRNA_EXPRESSION                                                     | 76  | 1.560153 | 0.172651 |
| REACTOME_FORMATION_OF_TC_NER_PRE_INCISION_COMPLEX                                                              | 52  | 1.556269 | 0.171755 |
| REACTOME_P75NTR_SIGNALS_VIA_NF_KB                                                                              | 15  | 1.55442  | 0.170508 |
| REACTOME_ACTIVATED_PKN1_STIMULATES_TRANSCRIPTION_OF_AR_ANDROGEN_RECEPTOR_REGULATED_GENES_KLK2_AND_KLK3         | 33  | 1.550302 | 0.172005 |
| REACTOME_TRANSCRIPTIONAL_REGULATION_OF GRANULOPOIESIS                                                          | 56  | 1.549487 | 0.169161 |
| REACTOME_FORMATION_OF_THE_BETA_CATENIN_TCF_TRANSACTIVATING_COMPLEX                                             | 61  | 1.548597 | 0.167521 |



|                                                                        |     |          |          |
|------------------------------------------------------------------------|-----|----------|----------|
| REACTOME_EPIGENETIC_REGULATION_OF_GENE_EXPRESSION                      | 113 | 1.545807 | 0.169608 |
| REACTOME_MRNA_CAPPING                                                  | 28  | 1.539692 | 0.171467 |
| REACTOME_B_WICH_COMPLEX_POSITIVELY_REGULATES_RRNA_EXPRESSION           | 58  | 1.535715 | 0.172508 |
| REACTOME_CYCLIN_A_CDK2_ASSOCIATED_EVENTS_AT_S_PHASE_ENTRY              | 80  | 1.533588 | 0.171664 |
| REACTOME_OXIDATIVE_STRESS_INDUCED_SENESCENCE                           | 88  | 1.532286 | 0.170114 |
| REACTOME_AMYLOID_FIBER_FORMATION                                       | 64  | 1.531269 | 0.168856 |
| REACTOME_INFLUENZA_INFECTION                                           | 117 | 1.524853 | 0.177163 |
| REACTOME_RRNA_PROCESSING                                               | 161 | 1.523799 | 0.175456 |
| REACTOME_ABORTIVE_ELONGATION_OF_HIV_1_TRANSCRIPT_IN_THE_ABSENCE_OF_TAT | 22  | 1.523257 | 0.175333 |
| REACTOME_POSITIVE_EPIGENETIC_REGULATION_OF_RRNA_EXPRESSION             | 72  | 1.519612 | 0.179256 |
| REACTOME_METABOLISM_OF_POLYAMINES                                      | 54  | 1.513546 | 0.18058  |
| REACTOME_NONSENSE_MEDIATED_DECAY_NMD                                   | 79  | 1.510758 | 0.182073 |
| REACTOME_DEGRADATION_OF_DVL                                            | 53  | 1.50713  | 0.1833   |
| REACTOME_SIRT1_NEGATIVELY_REGULATES_RRNA_EXPRESSION                    | 37  | 1.502177 | 0.186786 |
| REACTOME_PRE_NOTCH_EXPRESSION_AND_PROCESSING                           | 80  | 1.502052 | 0.184445 |
| REACTOME_DNA_METHYLATION                                               | 34  | 1.49901  | 0.186451 |
| REACTOME_REPRODUCTION                                                  | 91  | 1.497232 | 0.188127 |
| REACTOME_TRANSCRIPTION_COUPLED_NUCLEOTIDE_EXCISION_REPAIR_TC_NER       | 76  | 1.493491 | 0.188147 |
| REACTOME_REGULATION_OF_EXPRESSION_OF_SLITS_AND_ROBOS                   | 129 | 1.488774 | 0.191595 |
| REACTOME_SRP_DEPENDENT_COTRANSLATIONAL_PROTEIN_TARGETING_TO_MEMBRANE   | 75  | 1.481835 | 0.201191 |
| REACTOME_CELLULAR_RESPONSES_TO_EXTERNAL_STIMULI                        | 486 | 1.480829 | 0.198844 |
| REACTOME_EUKARYOTIC_TRANSLATION_ELONGATION                             | 58  | 1.474574 | 0.207194 |
| REACTOME_ORC1_REMOVAL_FROM_CHROMATIN                                   | 66  | 1.471954 | 0.208534 |
| REACTOME_ASSEMBLY_OF_THE_PRE_REPLICATIVE_COMPLEX                       | 63  | 1.470746 | 0.208734 |

|                                                                                                |     |          |          |
|------------------------------------------------------------------------------------------------|-----|----------|----------|
| REACTOME_KERATAN_SULFATE_BIOSYNTHESIS                                                          | 21  | 1.464303 | 0.215357 |
| REACTOME_SENESCENCE_ASSOCIATED_SECRETORY_PHENOTYPE_SASP                                        | 75  | 1.464137 | 0.213509 |
| REACTOME_TRANSLATION                                                                           | 240 | 1.45829  | 0.223907 |
| REACTOME_VOLTAGE_GATED_POTASSIUM_CHANNELS                                                      | 20  | 1.454349 | 0.226557 |
| REACTOME_DNA_DAMAGE_RECOGNITION_IN_GG_NER                                                      | 37  | 1.447582 | 0.233274 |
| REACTOME_INTERCONVERSION_OF_NUCLEOTIDE_DI_AND_TRIPHOSPHATES                                    | 25  | 1.447349 | 0.231582 |
| REACTOME_APC_C_MEDIATED_DEGRADATION_OF_CELL_CYCLE_PROTEINS                                     | 81  | 1.443777 | 0.23438  |
| REACTOME_POLYMERASE_SWITCHING_ON_THE_C_STRAND_OF_THE_TELOMERE                                  | 16  | 1.439511 | 0.23541  |
| REACTOME_TNFR1_INDUCED_NFKAPPAB_SIGNALING_PATHWAY                                              | 27  | 1.437981 | 0.233472 |
| REACTOME_DUAL_INCISION_IN_TC_NER                                                               | 63  | 1.437643 | 0.231104 |
| REACTOME_REGULATION_OF_RUNX3_EXPRESSION_AND_ACTIVITY                                           | 51  | 1.432937 | 0.234545 |
| REACTOME_KERATAN_SULFATE_KERATIN_METABOLISM                                                    | 27  | 1.430326 | 0.236033 |
| REACTOME_PCP_CE_PATHWAY                                                                        | 85  | 1.427146 | 0.237307 |
| REACTOME_NEGATIVE_REGULATION_OF_NOTCH4_SIGNALING                                               | 51  | 1.42502  | 0.237688 |
| REACTOME_SIGNALING_BY_NOTCH4                                                                   | 78  | 1.420591 | 0.246818 |
| REACTOME_KSRP_KHSRP_BINDS_AND_DESTABILIZES_MRNA                                                | 16  | 1.420209 | 0.244459 |
| REACTOME_TRANSCRIPTIONAL_REGULATION_BY_RUNX2                                                   | 108 | 1.419713 | 0.243666 |
| REACTOME_DECTIN_1_MEDIATED_NONCANONICAL_NFKB_SIGNALING                                         | 58  | 1.419439 | 0.241926 |
| REACTOME_RESPONSE_OF_EIF2AK4_GCN2_TO_AMINO_ACID_DEFICIENCY                                     | 66  | 1.418276 | 0.240912 |
| REACTOME_RUNX1_REGULATES_GENES_INVOLVED_IN_MEGAKARYOCYTE_DIFFERENTIATION_AND_PLATELET_FUNCTION | 64  | 1.417405 | 0.239215 |
| REACTOME_ESR_MEDIATED_SIGNALING                                                                | 178 | 1.414636 | 0.242566 |
| REACTOME_DNA_REPLICATION                                                                       | 119 | 1.407263 | 0.249869 |
| REACTOME_NUCLEOTIDE_SALVAGE                                                                    | 20  | 1.406257 | 0.249112 |

**Supplementary Table 2.** Gene sets enriched in Sim 1.1 vs. DMSO in infected samples according to Gene set enrichment analysis (GSEA).
